# Supplementary material
Source: PubMed Central journal article supplement (PMC10174341)
Supplement: mmc1.pdf [file mmc1.pdf]

1 **Supplementary Material for**

2 **Purification and characterisation of heparin-like sulfated polysaccharides with**  
3 **potent anti-SARS-CoV2 activity from snail mucus of *Achatina fulica***

4  
5 Kanchanok Kodchakorn, Tawan Chokepaichitkool, Prachya Kongtawelert\*

6  
7 Thailand Excellence Center for Tissue Engineering and Stem Cells, Department of  
8 Biochemistry, Faculty of Medicine, Chiang Mai University, Chiang Mai 50200  
9 Thailand

10  
11 \* Correspondence to; [prachya.k@cmu.ac.th](mailto:prachya.k@cmu.ac.th) (P.K.)

12  
13 **This PDF file includes:**

14 Table S1 to S2

15 Figures. S1 to S4

18

19 **Table S1.**  $^{13}\text{C}$  NMR chemical shifts for acharan sulfate from snail mucus (AS-GAG). Carbons labeled as I and G refer to Iduronic  
20 acid (IdoA) and N-acetyl glucosamine (GlcNAc) units, respectively.

| Sugar residues                                             | Chemical Shifts / ppm |        |        |        |        |         |         |        |
|------------------------------------------------------------|-----------------------|--------|--------|--------|--------|---------|---------|--------|
|                                                            | 1                     | 2      | 3      | 4      | 5      | 6       | 7       | 8      |
| I; $\rightarrow 4) - \alpha - \text{IdoA} \rightarrow 1$   | 99.233                | 73.281 | 63.721 | 69.743 | 66.397 | 174.801 | –       | –      |
| G; $\rightarrow 4) - \alpha - \text{GlcNAc} \rightarrow 1$ | 93.927                | 53.680 | 68.573 | 77.250 | 71.220 | 59.679  | 174.801 | 22.217 |

21

22

23

24

25 **Table S2.** Determination of anti-SARS-ACE2 binding for the unfractionated  
 26 polysaccharide inhibitors.

| Inhibitors                        | IC <sub>50</sub>           | IC <sub>50</sub> 95% CI         | Ref. |
|-----------------------------------|----------------------------|---------------------------------|------|
| AS-GAGs <sup>a</sup>              | 28.4 µg mL <sup>-1</sup>   | 4.33 – 5.29 µg mL <sup>-1</sup> |      |
| Enoxaparin <sup>a</sup>           | 91.5 µg mL <sup>-1</sup>   | 5.20 – 5.65 µg mL <sup>-1</sup> |      |
| Pentosan polysulfate <sup>a</sup> | 57.1 µg mL <sup>-1</sup>   | 4.31 – 4.84 µg mL <sup>-1</sup> |      |
| Heparan sulfate <sup>a</sup>      | 132.4 µg mL <sup>-1</sup>  | 2.11 – 2.14 µg mL <sup>-1</sup> |      |
| Heparin                           | 0.12 µg mL <sup>-1</sup>   | 0.09 – 0.15 µg mL <sup>-1</sup> | [21] |
| Heparan sulfate                   | 62 µg mL <sup>-1</sup>     | >15 µg mL <sup>-1</sup>         | [21] |
| LMWH                              | 5 – 12 µg mL <sup>-1</sup> | –                               | [22] |
| UFH                               | 1 – 4 µg mL <sup>-1</sup>  | –                               | [22] |
|                                   | 5.99 µg L <sup>-1</sup>    | 2.90 – 11.96 µg L <sup>-1</sup> | [25] |
| Enoxaparin                        | 1.08 mg L <sup>-1</sup>    | 247 – 4164 µg L <sup>-1</sup>   | [25] |

27 <sup>a</sup> Values from this work.

28

29

30 **Figure S1.**

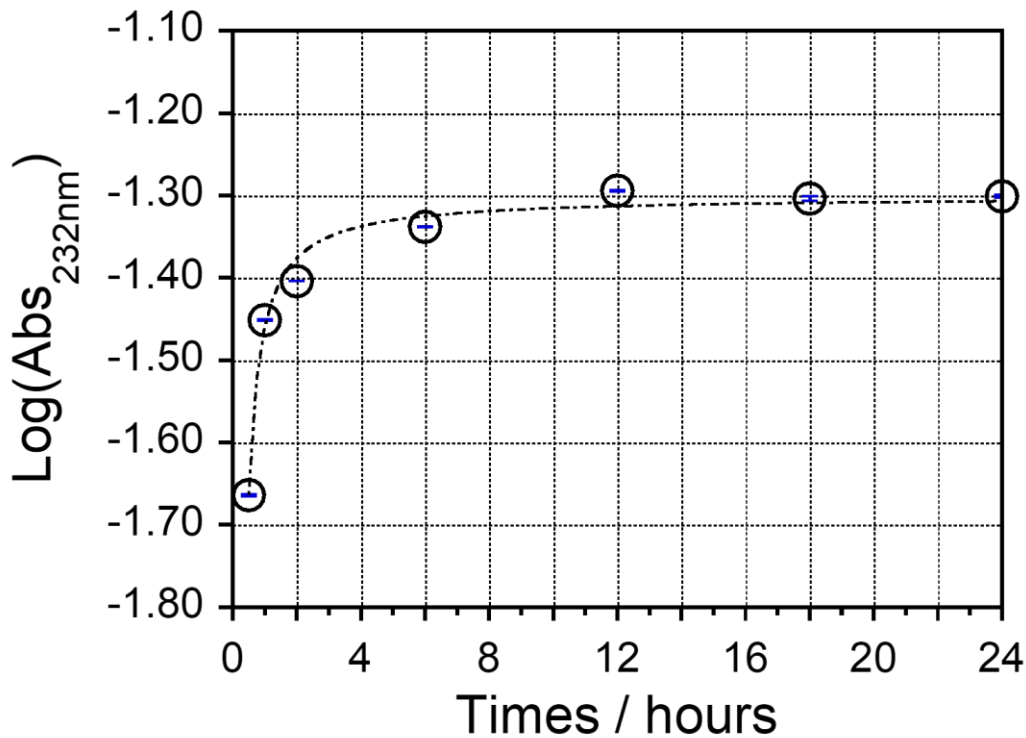

31

32 **Fig. S1.** Effect of hydrolysis time on the relative change ( $\text{Log}(\text{Abs}_{232\text{nm}})$ ) of the  
33 unsaturated disaccharide content of mGAG-F3 enzymatic hydrolysis by  
34 treatment with a combination of heparin lyase I (EC 4.2.2.7), II  
35 (Heparitinase II), and III (EC 4.2.2.8). The digested mixture was in 0.3 mL  
36 of 50 mM Tris-HCl buffer (pH 7.2) and 10 mM CaCl<sub>2</sub> at 37°C for 24 hrs,  
37 after which the reaction samples were heated in a boiling water for 3  
38 minutes. Results are reported as mean  $\pm$  SD. Error bar denotes standard  
39 deviation.

40

41

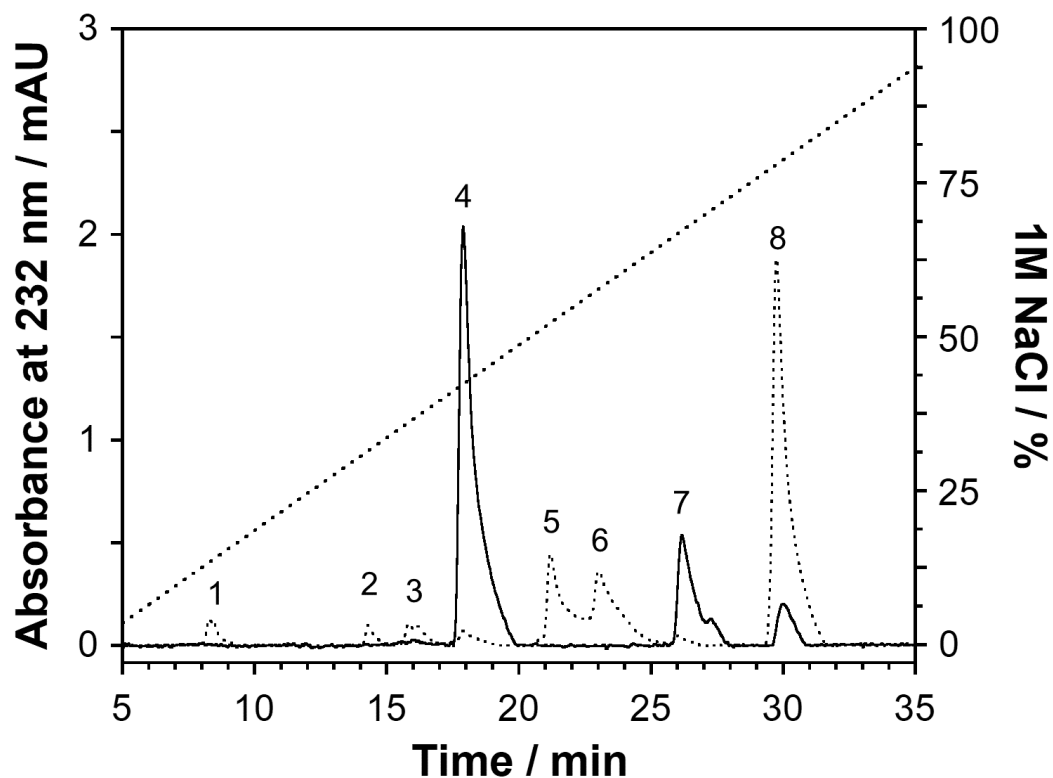

43

44 **Fig. S2.** SAX-HPLC chromatogram of mGAG-F3 (solid line) and heparin (dashed  
 45 line) disaccharides by treatment with a combination of heparin lyase I (EC  
 46 4.2.2.7), II (Heparitinase II), and III (EC 4.2.2.8), eluting with a linear  
 47 gradient of 0.1 – 1.0 M NaCl (dotted line) at a flow rate of 1.0 mL/min. The  
 48 elutions were monitored by absorbance at 232 nm for detecting the  
 49 unsaturated non-reducing ends of the disaccharides. The standard  
 50 disaccharide positions are indicated by number labels; 1:  $\Delta$ UA-GlcNAc, 2:  
 51  $\Delta$ UA-GlcNSO<sub>3</sub>, 3:  $\Delta$ UA-GlcNAc(6S), 4:  $\Delta$ UA(2S)-GlcNAc, 5:  $\Delta$ UA-  
 52 GlcNSO<sub>3</sub>(6S), 6:  $\Delta$ UA(2S)-GlcNSO<sub>3</sub>, 7:  $\Delta$ UA(2S)-GlcNAc(6S), 8:  $\Delta$ UA(2S)-  
 53 GlcNSO<sub>3</sub>(6S).

54

55

56 **Figure S3.**

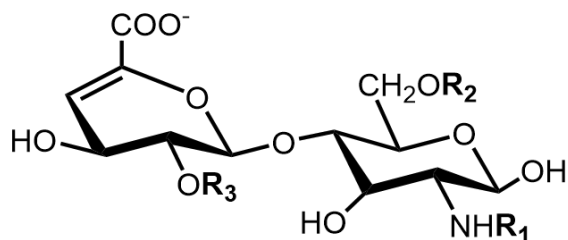

| No. | Disaccharide                             | R1              | R2              | R3              |
|-----|------------------------------------------|-----------------|-----------------|-----------------|
| 1   | $\Delta$ UA-GlcNAc                       | Ac              | H               | H               |
| 2   | $\Delta$ UA-GlcNSO <sub>3</sub>          | SO <sub>3</sub> | H               | H               |
| 3   | $\Delta$ UA-GlcNAc(6S)                   | Ac              | SO <sub>3</sub> | H               |
| 4   | $\Delta$ UA(2S)-GlcNAc                   | Ac              | H               | SO <sub>3</sub> |
| 5   | $\Delta$ UA-GlcNSO <sub>3</sub> (6S)     | SO <sub>3</sub> | SO <sub>3</sub> | H               |
| 6   | $\Delta$ UA(2S)-GlcNSO <sub>3</sub>      | SO <sub>3</sub> | H               | SO <sub>3</sub> |
| 7   | $\Delta$ UA(2S)-GlcNAc(6S)               | Ac              | SO <sub>3</sub> | SO <sub>3</sub> |
| 8   | $\Delta$ UA(2S)-GlcNSO <sub>3</sub> (6S) | SO <sub>3</sub> | SO <sub>3</sub> | SO <sub>3</sub> |

57

58 **Fig. S3.** 2D Structure of the commonly occurring unsaturated disaccharides  
59 derived from digestion with heparinase enzymes. Abbreviations: Ac,  
60 acetyl;  $\Delta$ UA,  $\Delta$ (4,5) unsaturated hexuronic acid; GlcNAc, N-acetylated  
61 glucosamine; GlcNSO<sub>3</sub>, N-sulfated glucosamine; H, hydrogen; 2S and 6S, 2-  
62 O-sulfate and 6-O-sulfate, respectively.

63

64

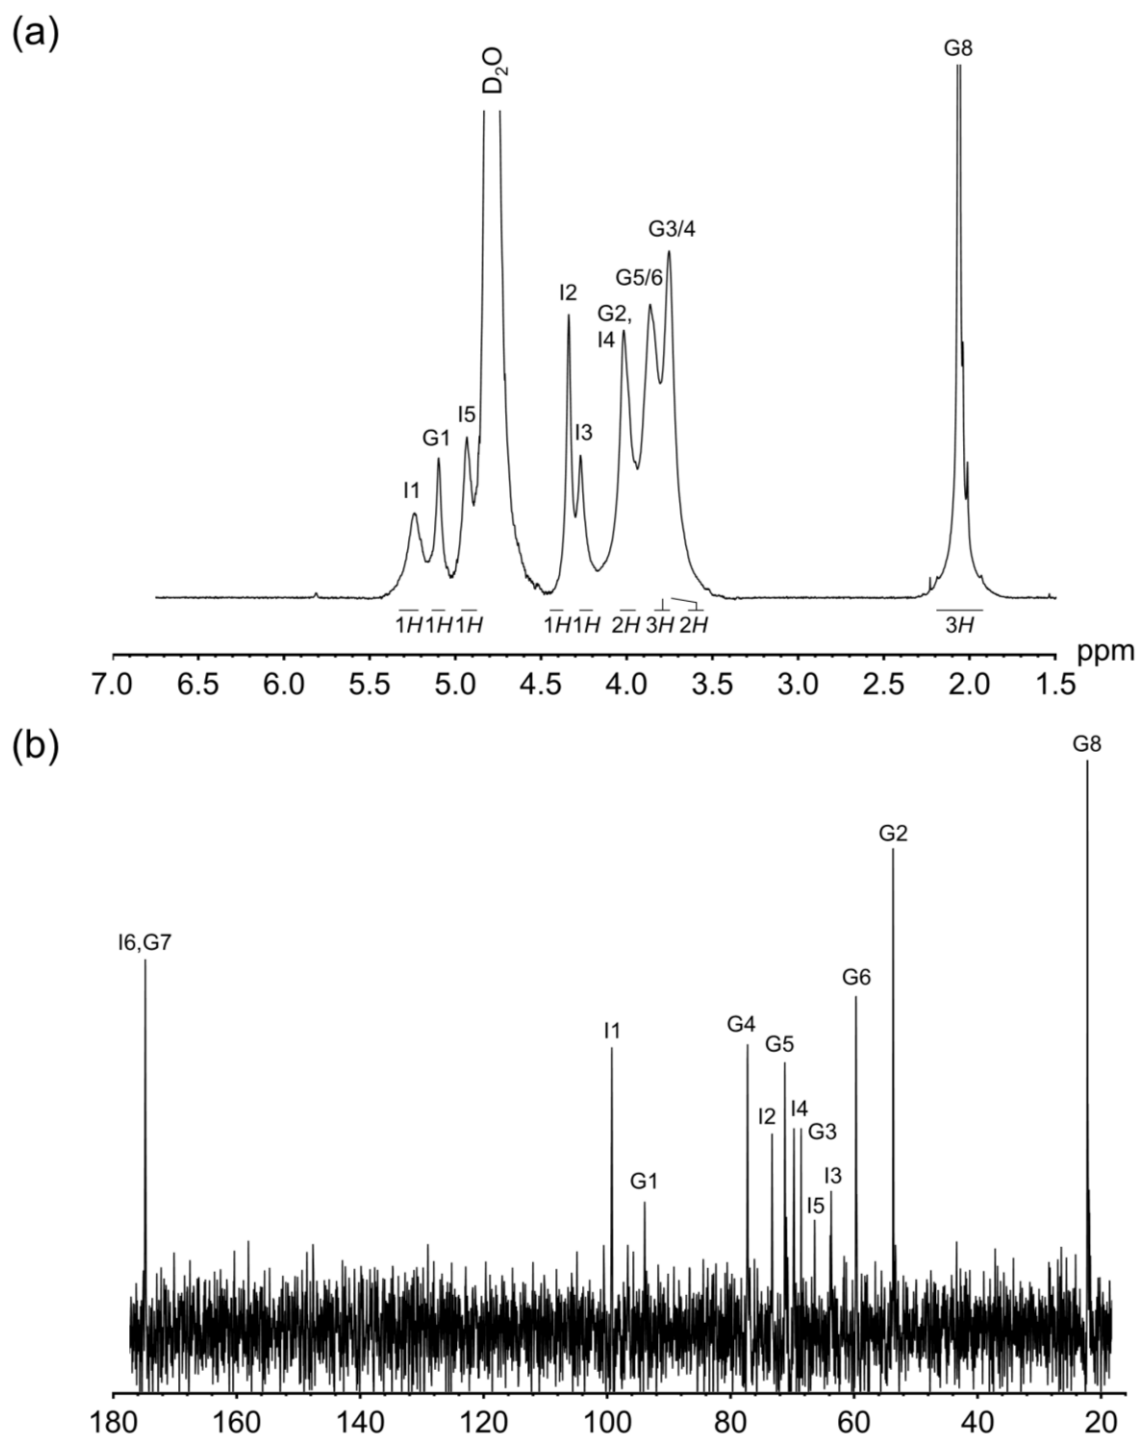

65

66 **Fig. S4.** (a)  $^1\text{H}$ - and (b)  $^{13}\text{C}$ -NMR spectra of the AS-GAG from the mucus of *A. fulica*.  
 67 The assignment was based on comparison with the previously described  
 68 acharan sulfate. The peaks are labeled as I or G for Iduronic acid (IdoA)  
 69 and *N*-acetyl glucosamine (GlcNAc) units, respectively. The number after  
 70 these letters indicate the positions of  $^1\text{H}$  and  $^{13}\text{C}$ .

71

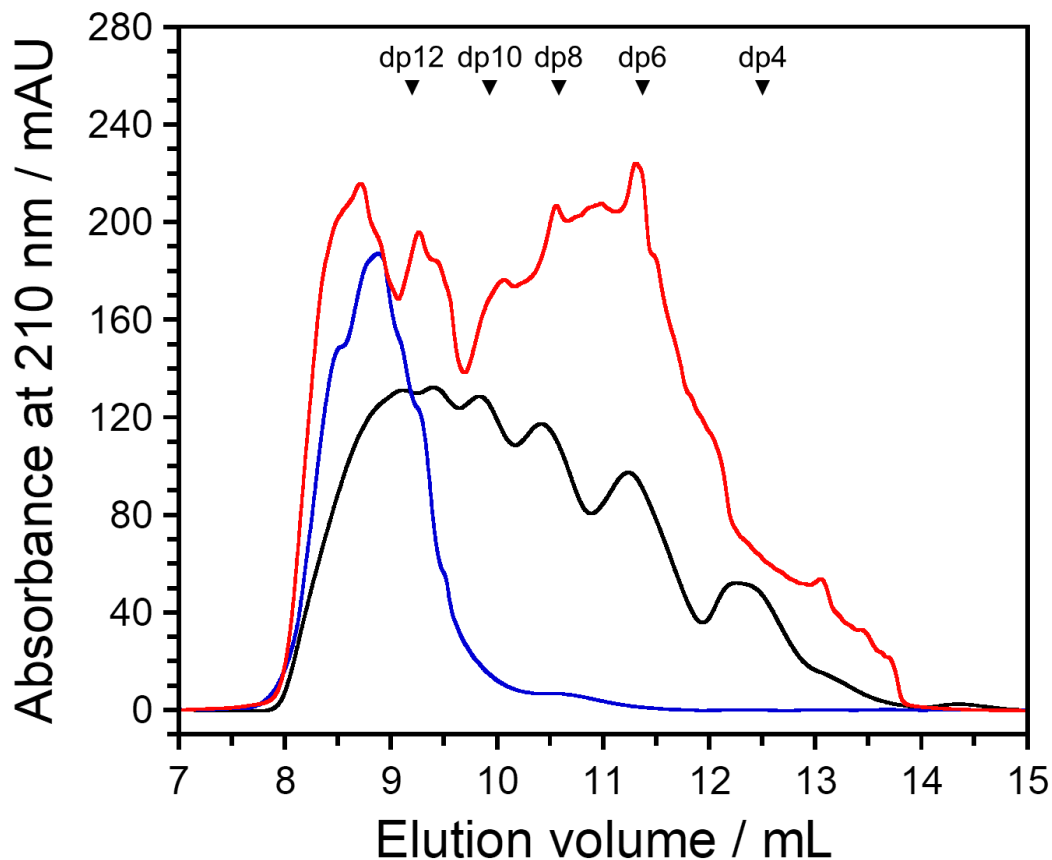

73

74 **Fig. S5.** Size exclusion chromatography analysis of the partial digest product of  
 75 sulfated polysaccharide; mGAG-F3 between pre- (blue) and post- (red)  
 76 depolymerization, in comparison to LMWH (black). The mGAG-F3 was  
 77 depolymerized by partial digestion with a combination of heparin lyase I  
 78 (EC 4.2.2.7), II (Heparitinase II), and III (EC 4.2.2.8). The digests were  
 79 chromatographed on a Superdex 30 Increase 30/100 column using 0.1 M  
 80 ammonium acetate (pH 7.0) as the eluent at 1.5 CV at flow rate 0.5 ml/min.  
 81 The centers of tetrasaccharide, hexasaccharide, octasaccharide,  
 82 deca-saccharide, and deca-saccharide peaks are marked with arrows. A  
 83 calibration curve was plotted by the logarithm of molecular weights versus  
 84 retention time in each standard position. The molecular weight of mGAG-  
 85 F3 fraction was estimated by compared with the calibration curve.

86

87

88

89
